# Supplementary material
Source: Springer Nature journal article supplement (https://www.springermedizin.de/resource/supplementary/12984_2012_406_MOESM4_ESM.pdf/9605942)

**ND Arm**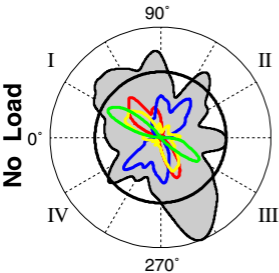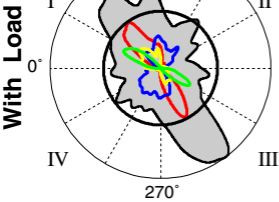**D Arm**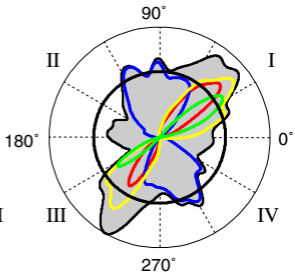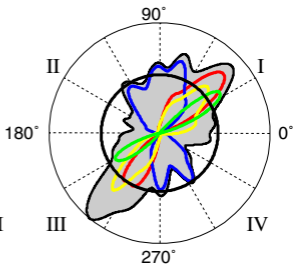

Supplement: MOESM4 [file 9605942]
